# Supplementary material for: Synthesis of Finely Controllable Sizes of Au Nanoparticles on a Silica Template and Their Nanozyme Properties
Source: MDPI journal article supplement (doi:10.3390/ijms221910382), 2021-09-26
Supplement: s1 [file s1]

# Synthesis of Finely Controllable Sizes of Au Nanoparticles on a Silica Template and Their Nanozyme Properties

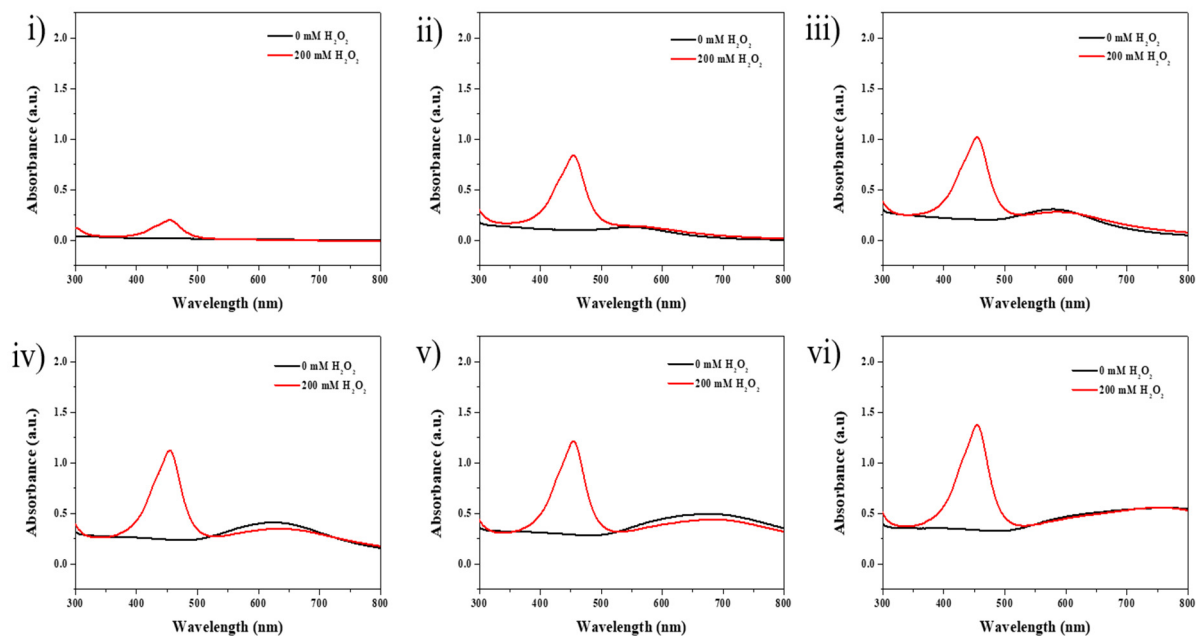

**Figure S1.** UV-Vis spectra of 0.1 mM TMB and 200 mM  $\text{H}_2\text{O}_2$  in the presence of various  $\text{SiO}_2\text{@Au}$  NPs fabricated at (i) 0  $\mu\text{M}$ , (ii) 50  $\mu\text{M}$ , (iii) 100  $\mu\text{M}$ , (iv) 150  $\mu\text{M}$ , (v) 200  $\mu\text{M}$ , and (vi) 300  $\mu\text{M}$  of  $\text{Au}^{3+}$  concentration.

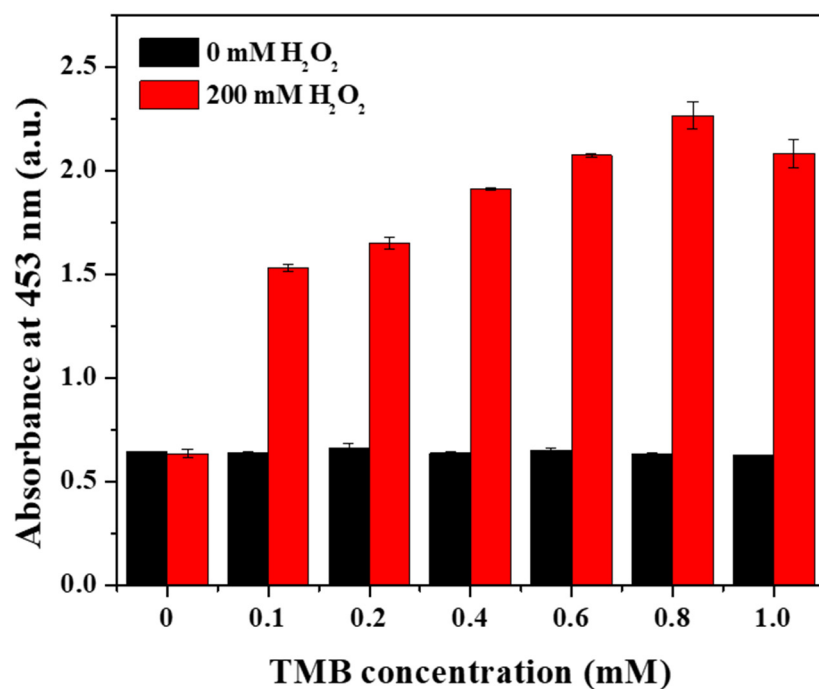

**Figure S2.** The effects of TMB concentration in the range of 0 to 1.0 mM on the peroxidase-like activity of  $\text{SiO}_2@\text{Au}$  in mixture of TMB and 200 mM  $\text{H}_2\text{O}_2$ : The UV-Vis absorbance plots of each condition at 453 nm wavelength which is absorbance of oxidated TMB substrate.

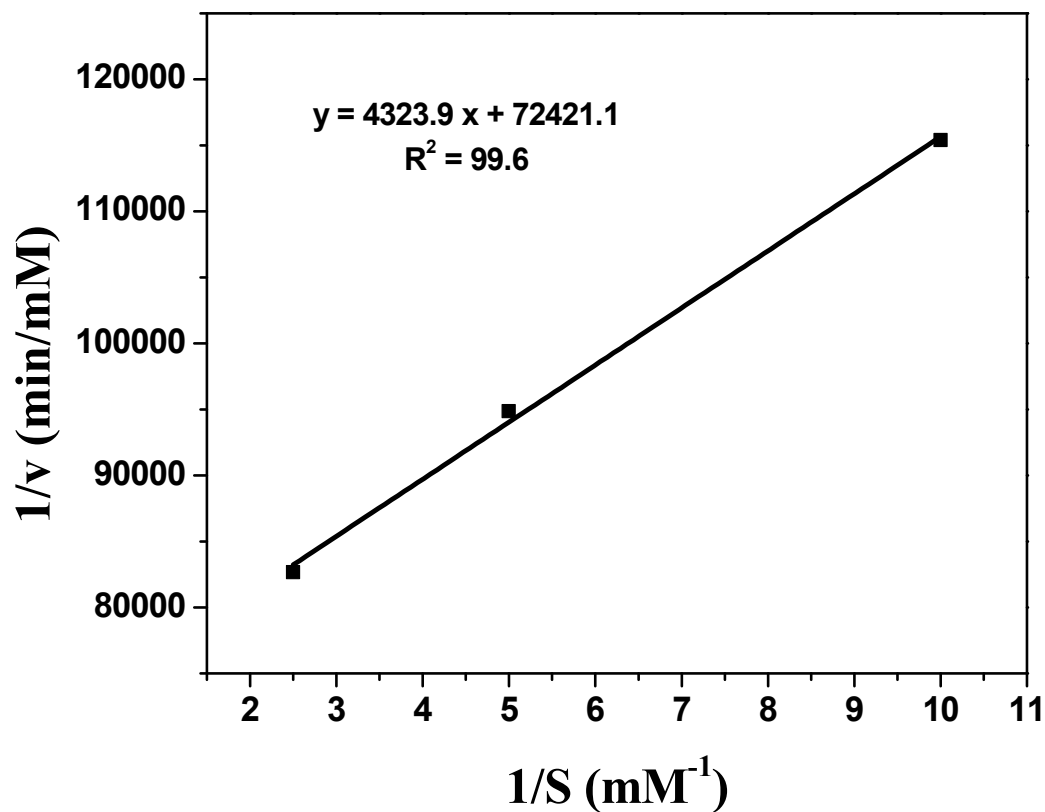

**Figure S3.** Kinetic analysis of SiO<sub>2</sub>@Au. Kinetic parameters of SiO<sub>2</sub>@Au were determined by using various TMB concentrations of 0.1-0.4 mM. The value of Michaelis constant  $K_m$  and maximal velocity of the reaction  $V_{max}$  is attained according to the Lineweaver-Burk equation ( $1/v = K_m/(V_{max}*[S]) + 1/V_{max}$ ).

$$V_{max} = 2.3 \times 10^{-10} \text{ M.s}^{-1}$$

$$K_m = 0.0597 \text{ mM}$$

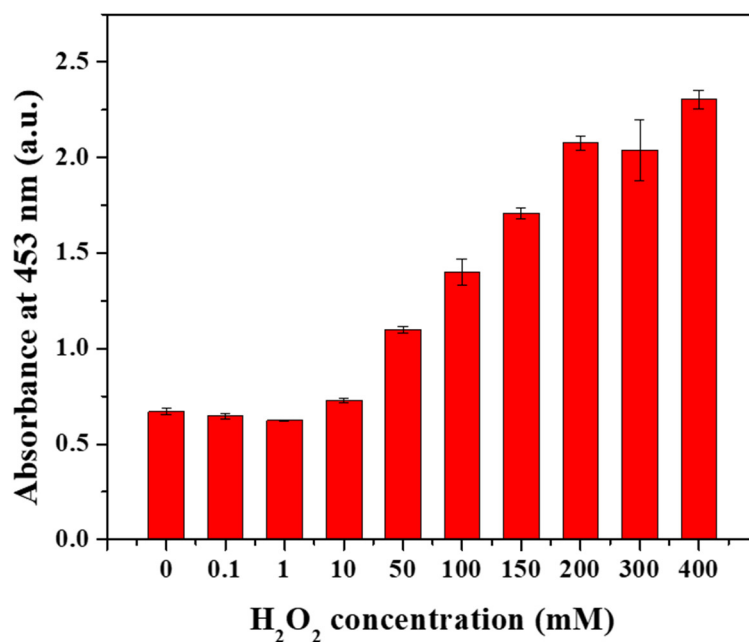

**Figure S4.** The effects of  $\text{H}_2\text{O}_2$  concentration in the range of 0.1 to 400 mM on the peroxidase-like activity of  $\text{SiO}_2@\text{Au}$  in mixture of 0.6 mM TMB and  $\text{H}_2\text{O}_2$ . The UV-Vis absorbance plots of each condition at 453 nm wavelength which is absorbance of oxidated TMB substrate.

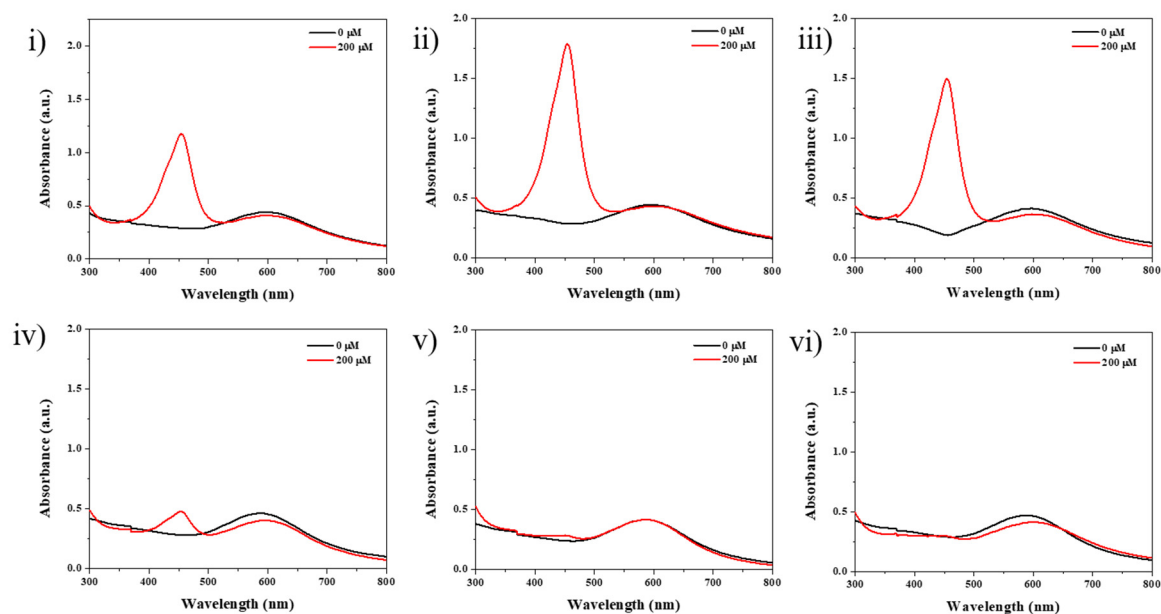

**Figure S5.** Effect of pH solution on the UV-Vis spectra of 0.6 mM TMB and 200 mM  $\text{H}_2\text{O}_2$  in the presence of  $\text{SiO}_2@\text{Au}$  at various pH conditions: (i) pH 3.0, (ii) pH 4.0, (iii) pH 5.0, (iv) pH 6.0, (v) pH 7.0, and (vi) pH 8.0.

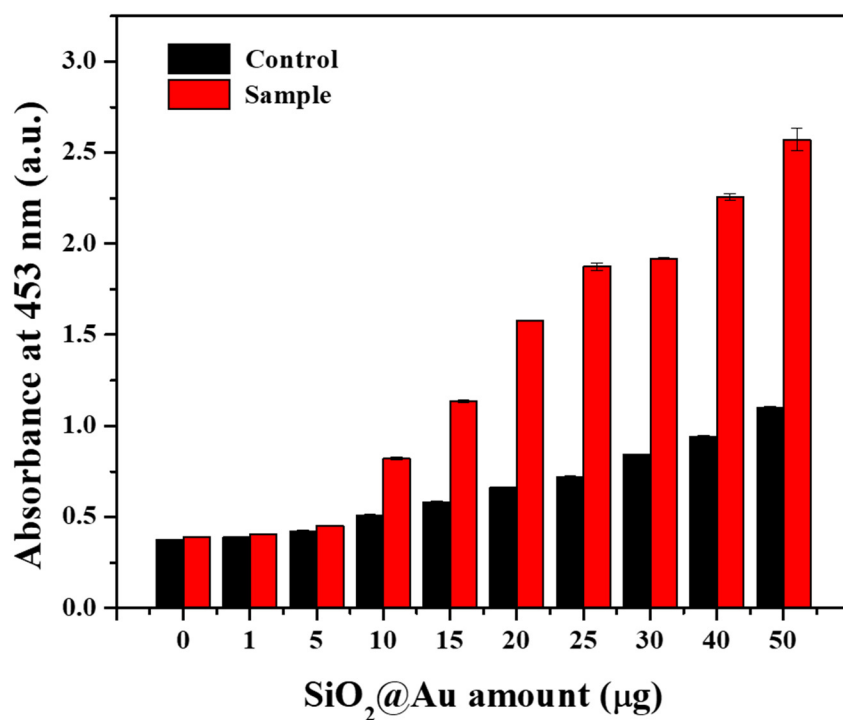

**Figure S6.** The effects of SiO<sub>2</sub>@Au amount in the range of 0 to 50 μg on the peroxidase-like activity of SiO<sub>2</sub>@Au in mixture of 0.6 mM TMB and H<sub>2</sub>O<sub>2</sub>. The UV-Vis absorbance plots of each condition at 453 nm wavelength which is absorbance of oxidated TMB substrate.

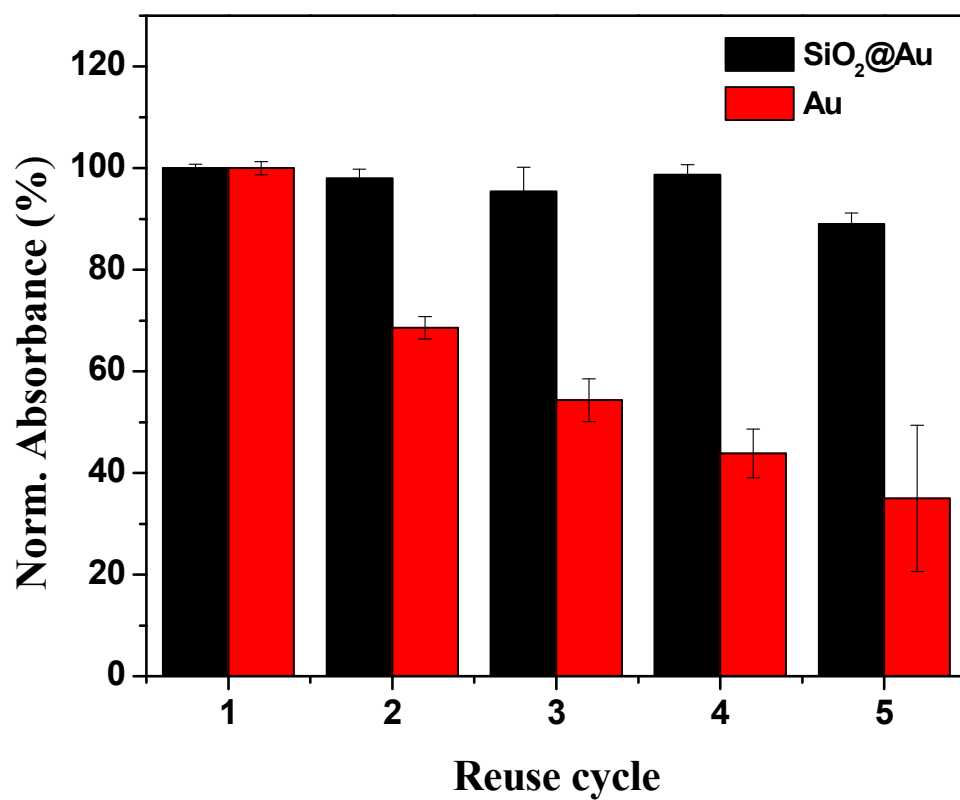

**Figure S7.** Reusability of SiO<sub>2</sub>@Au and Au NPs in a mixture of 0.6 mM TMB, 200 mM H<sub>2</sub>O<sub>2</sub>, and pH 4 buffer. The SiO<sub>2</sub>@Au and Au NPs were stored in PBST (0.1%) at room temperature.
